# Supplementary material
Source: PubMed Central journal article supplement (PMC6819206)
Supplement: NIHMS1026395-supplement-Supp_info.pdf [file NIHMS1026395-supplement-Supp_info.pdf]

Supplementary Table 1 Sequence of Primers Used for Real-Time Quantitative PCR

| Gene         | Forward               | Reverse               |
|--------------|-----------------------|-----------------------|
| 18s          | AGTCCCTGCCCTTTGTACACA | CGATCCGAGGGCCTCACTA   |
| IFN $\gamma$ | TGAGCTCATTGAATGCTTGG  | ACAGCAAGGCGAAAAAGGAT  |
| NOS2         | ACATCGACCCGTCACAGTAT  | CAGAGGGGTAGGCTTGTCTC  |
| IL-1 $\beta$ | GGTCAAAGGTTTGGAAGCAG  | TGTGAAATGCCACCTTTTGA  |
| IL-4         | ACAGGAGAAGGGACGCCAT   | GAAGCCCTACAGACGAGCTCA |
| IL-13        | CCTGGCTCTTGCTTGCCTT   | GGTCTTGTGTGATGTTGCTCA |
| CD206        | CAGGTGTGGGCTCAGGTAGT  | TGTGGTGAGCTGAAAGGTGA  |
| Caspase-1    | GCCCACTGCTGATAGGGTGA  | CCCGGGAAGAGGTAGAAACG  |
| ASC          | CCAGTGTCCCTGCTCAGAGT  | TCATCTTGTCTTGGCTGGTG  |
| NLRP3        | GTGGTGACCCTCTGTGAGGT  | TCTTCCTGGAGCGCTTCTAA  |
| NLRC4        | GCGGAGGTGGGAGATATG    | CGTAGAAGGTTTGGAACA    |
| IL-18        | CCAAATCACTTCCTCTTGGC  | GGCCAAAGTTGTCTGATTCC  |
| VEGF         | CCTTCGTCCTCTCCTTACCC  | AAGCCACTCACACACACAGC  |

## **Supplementary Figure legends:**

### **Supplementary Figure 1. High-fat diet (HFD), but not NLRC4, contributes to the early engraftment of metastatic tumor cells in the liver.**

WT and NLRC4<sup>-/-</sup> mice were injected via the spleen with MC38 colorectal cancer (CRC) cells after 6 weeks of being fed low-fat diet (LFD) or HFD which was continued for an additional 3 days. MC38 cells used were labeled by Vybrant Dil Cell-Labeling system. Liver sections were analyzed using fluorescent microscopy and tumor foci labeled were counted from randomly selected 10 fields of x100 magnification per slide. n=5, each group. Data are shown as mean ± S.D. per group.

### **Supplementary Figure 2. Palmitate-mediated IL-1 $\beta$ production from tumor-associated macrophages (TAMs).**

TAMs were isolated from WT mice. Cells were treated with 200 $\mu$ M palmitate for 24 hours, with or without pretreatment of 1 $\mu$ M TAK-242 for 1 hour. IL-1 $\beta$  protein concentrations in culture supernatant were measure by ELISA. Data are shown as mean ± S.E.M. from 3 independent experiments.

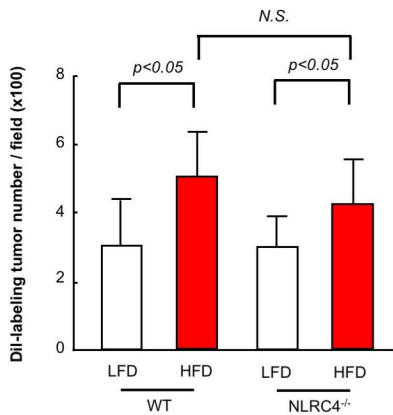

Supplementary Figure 1.

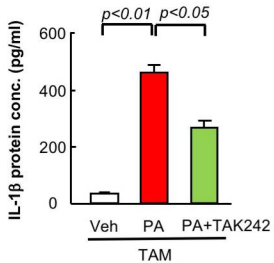

**Supplementary Figure 2.**
